# Supplementary material
Source: publisher figshare collection journal article supplement (https://acs.figshare.com/ndownloader/files/9727570)
Supplement: Supplementary file 1 [file 9727570]

## Supporting Information

Membranes for Continuous Non-Energized Air Freshener Perfume Delivery

Gui Min Shi <sup>a</sup>, Lin Hao <sup>a</sup>, Kelly Anderson <sup>b</sup>, Tai Shung Chung <sup>a,\*</sup>

<sup>a</sup> Department of Chemical and Biomolecular Engineering,  
National University of Singapore,  
Singapore 117576

<sup>b</sup> Corporate R&D, Singapore Branch,  
The Procter and Gamble Company,  
Singapore 138547

\* Corresponding author. Tel.: 65 6516 6645; fax: 65 6779 1936.

E-mail address: chencts@nus.edu.sg (T.S. Chung)

Number of pages: 9

Number of tables: 5

Number of figures: 3

Table S1. The physicochemical properties of the selected four perfume compounds

| Chemical name           | Conc. in model<br>perfume solution<br>(wt%) | Vapor<br>pressure at 25<br>°C (torr) | Molecular<br>weight<br>(g/mol) | Boiling<br>point<br>(°C) | Liquid<br>viscosity<br>(Pa·s) | Surface<br>tension<br>(mN/m) |
|-------------------------|---------------------------------------------|--------------------------------------|--------------------------------|--------------------------|-------------------------------|------------------------------|
| Ethyl-2-methyl butyrate | 25                                          | 7.33                                 | 130.20                         | 132-133                  | 7.74E-04                      | 25.5                         |
| Benzyl acetate          | 25                                          | 0.177                                | 150.18                         | 212                      | 2.12E-03                      | 36.0                         |
| Phenyl ethyl alcohol    | 25                                          | 0.0868                               | 122.17                         | 219-221                  | 1.12E-02                      | 39.6                         |
| Cyclamen aldehyde       | 25                                          | 0.00881                              | 190.30                         | 270                      | 8.31E-03                      | 32.5                         |

Table S2. The densities of perfume compounds, the experimental and calculated liquid sorption amounts based on the two different porosity values

| Chemical name           | Liquid density<br>(g/cm <sup>3</sup> ) | g(solvent)/g(membrane) | Ideal<br>g(solvent)/g(membrane) |
|-------------------------|----------------------------------------|------------------------|---------------------------------|
|                         |                                        | Experimental data      | 42% porosity                    |
| Ethyl 2-methyl butyrate | 0.865                                  | 0.411                  | 0.432                           |
| Benzyl acetate          | 1.05                                   | 0.535                  | 0.524                           |
| Phenyl ethyl alcohol    | 1.017                                  | 0.517                  | 0.508                           |
| Cyclamen aldehyde       | 0.95                                   | 0.480                  | 0.474                           |

Table S3. The contact angles and liquid sorption behaviours of the different perfume compounds

| Chemical name           | Contact angle | g(solvent absorbed)/g(membrane)*100 |       |       |
|-------------------------|---------------|-------------------------------------|-------|-------|
|                         |               | 25 °C                               | 35 °C | 45 °C |
| Water                   | 111.9         | -                                   | -     | -     |
| Ethyl-2-methyl butyrate | 9.0           | 41.08                               | 40.73 | 40.39 |
| Benzyl acetate          | 33.2          | 53.47                               | 53.15 | 52.84 |
| Phenyl ethyl alcohol    | 47.1          | 51.73                               | 51.30 | 50.91 |
| Cyclamen aldehyde       | 32.2          | 48.04                               | 47.84 | 47.61 |

Table S4. The compounds absorbed by the membrane through capillary. The initial ratio is 1:1:1:1 (25 wt% each); the final weight ratios are normalized with benzyl acetate (set as 1)

| Diagram                                                                                                                                                                                                                              | Condition    | Ethyl 2-methyl<br>butyrate | Benzyl<br>acetate | Phenyl ethyl<br>alcohol | Cyclamen<br>aldehyde |
|--------------------------------------------------------------------------------------------------------------------------------------------------------------------------------------------------------------------------------------|--------------|----------------------------|-------------------|-------------------------|----------------------|
| 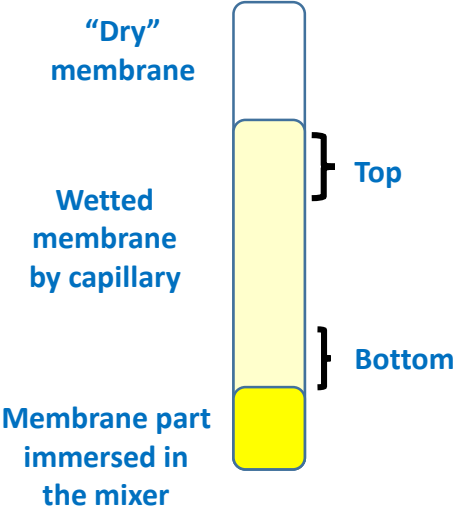 <p>“Dry”<br/>membrane</p> <p>Wetted<br/>membrane<br/>by capillary</p> <p>Membrane part<br/>immersed in<br/>the mixer</p> <p>Top</p> <p>Bottom</p> | 25 °C top    | 0.93±0.01                  | 1.00              | 0.94±0.01               | 0.69±0.02            |
|                                                                                                                                                                                                                                      | 25 °C bottom | 0.90±0.01                  | 1.00              | 1.03±0.01               | 0.65±0.04            |

Table S5. The perfume release rates of the air freshener membrane for the pure perfume compounds and the calculated release rate that the liquid perfume spills out of the membrane (testing conditions: air velocity: 0.1 m/s, temperature: 25 °C)

| Diagram                                                                            | Chemical name                                                                            | Ethyl-2-methyl butyrate | Benzyl acetate | Phenyl ethyl alcohol | Cyclamen aldehyde |
|------------------------------------------------------------------------------------|------------------------------------------------------------------------------------------|-------------------------|----------------|----------------------|-------------------|
|  | Perfume release rate, (mg/cm <sup>2</sup> -h)                                            | 41.6                    | 0.73           | 0.45                 | 0.002             |
|                                                                                    | The critical static head when the membrane starts to leak, cm                            | -                       | 11             | 10                   | 9                 |
|                                                                                    | The calculated flow rate for one pore using Darcy-Weisbach equation, (m <sup>3</sup> /s) | -                       | 3.89E-24       | 6.46E-25             | 7.20E-25          |
|                                                                                    | The calculated membrane flux, (mg/cm <sup>2</sup> -h)                                    | -                       | 1.97           | 0.317                | 0.329             |
|                                                                                    |                                                                                          |                         |                |                      |                   |

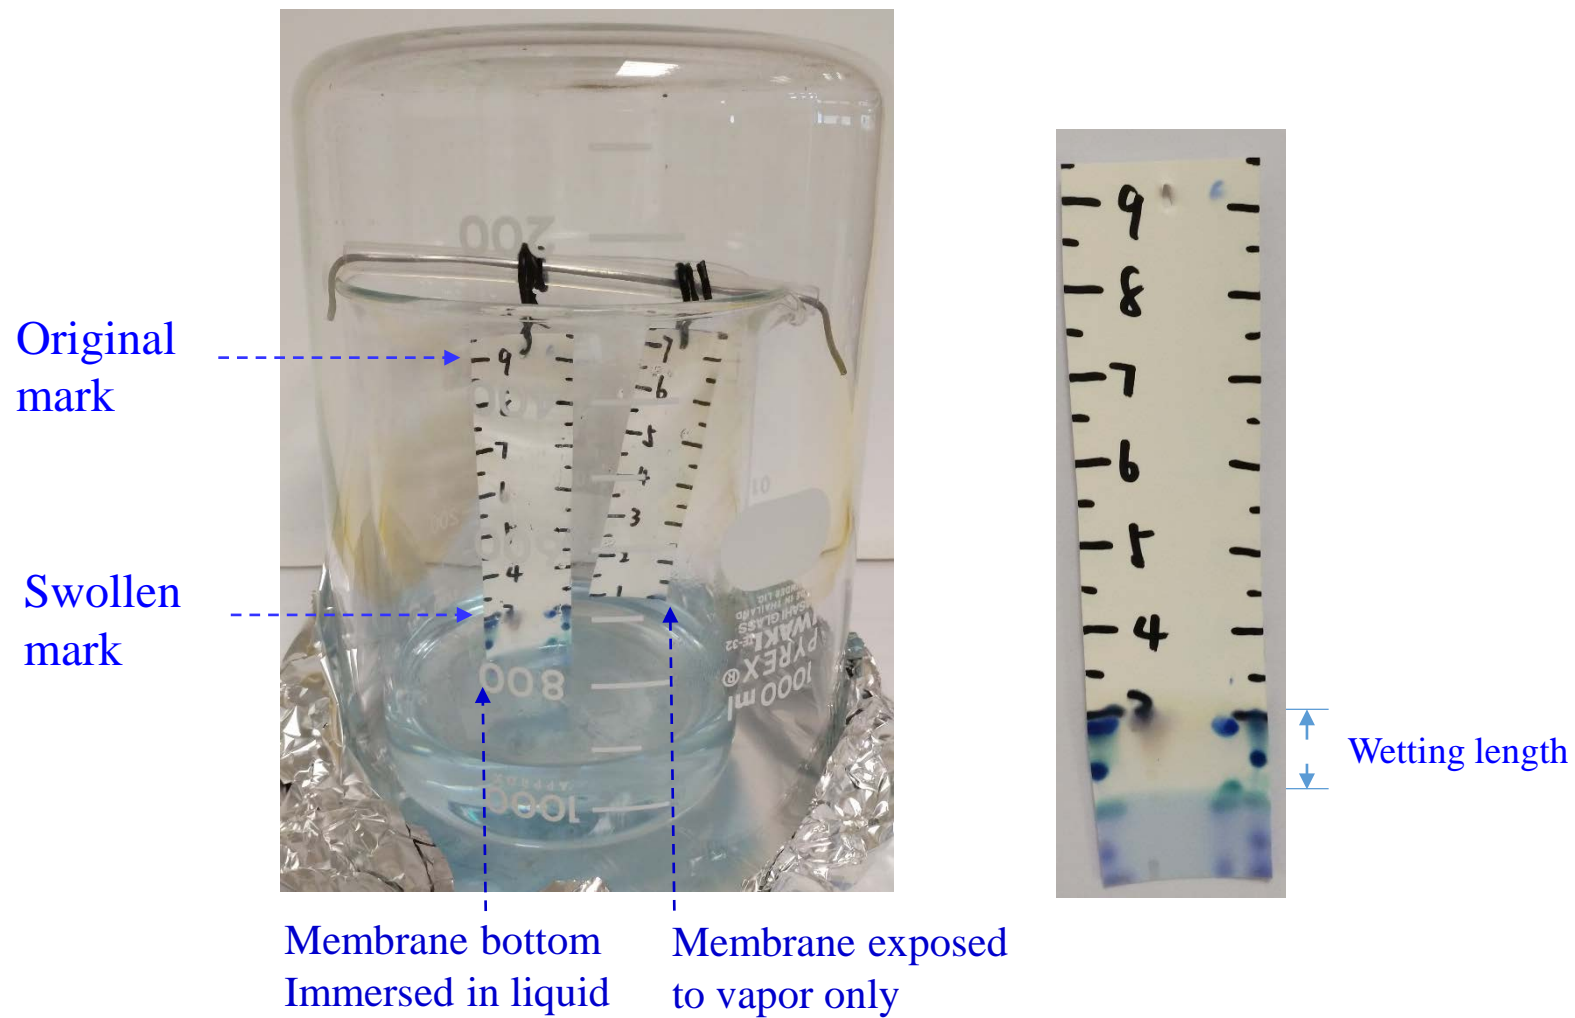

Fig. S1. The device to estimate the wetting lengths and rates in different perfume compounds.

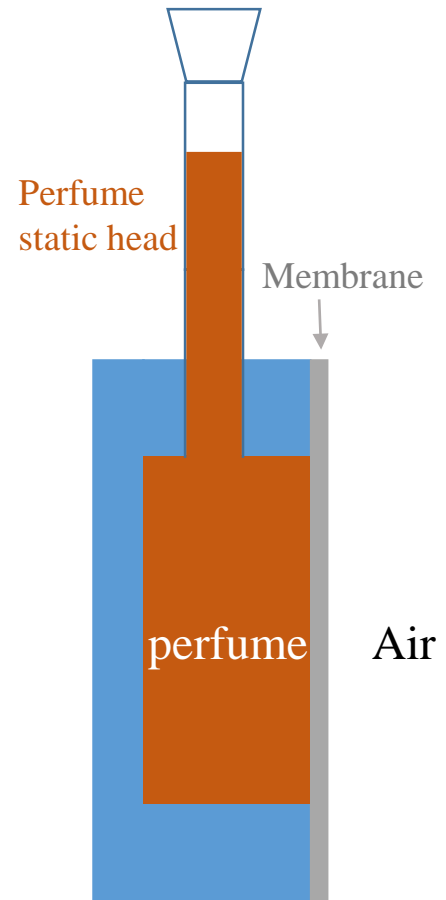

Fig. S2. The device to measure the static head in the air freshener membrane-enclosed perfume reservoir.



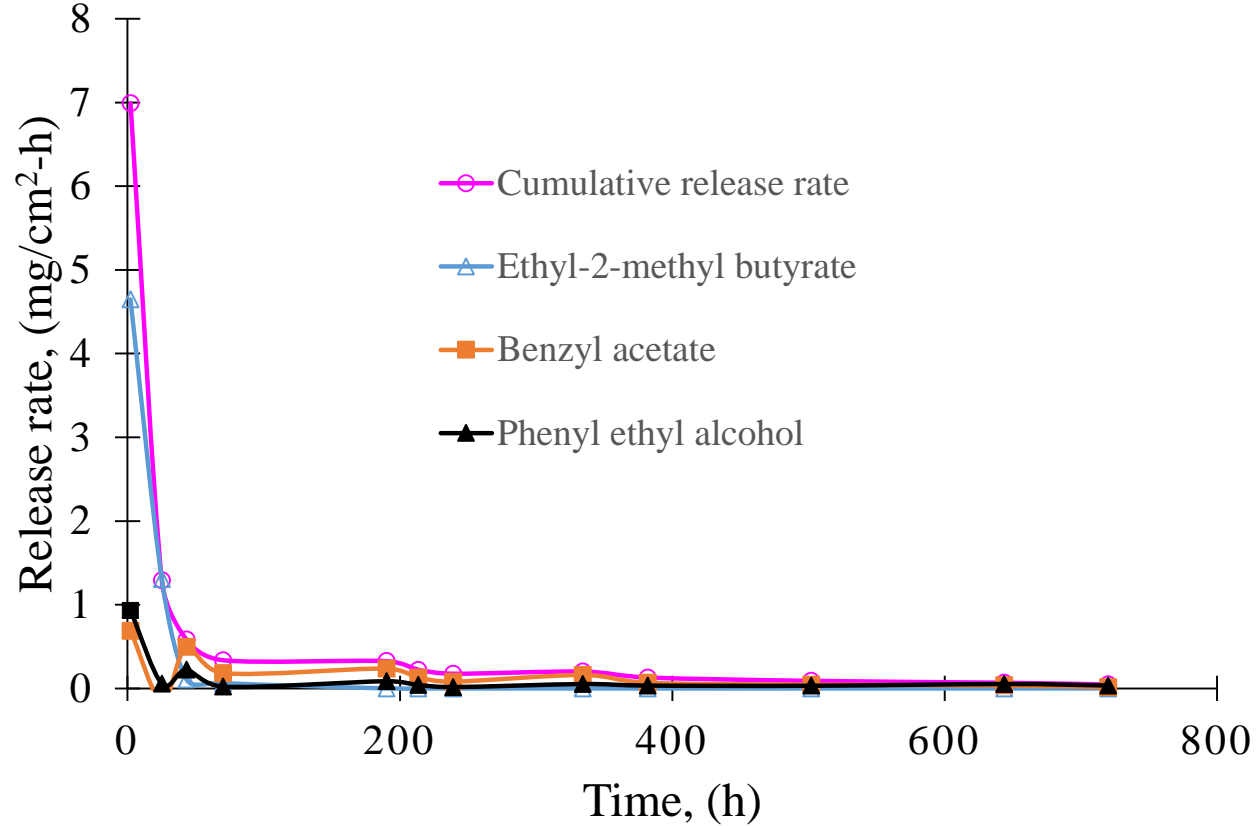

Fig. S3. Calculated individual perfume release rates of a model perfume (a mixed solvent comprising 25 wt% each) from its weight loss and perfume reservoir compositions in the membrane air freshener (testing conditions: air velocity:  $0.1 \pm 0.02$  m/s, temperature:  $25 \pm 1^\circ\text{C}$ ).
